# Supplementary material for: Delayed Antiviral Immune Responses in Severe Acute Respiratory Syndrome Coronavirus Infected Pregnant Mice
Source: PubMed Central journal article supplement (PMC8814454; doi:10.3389/fmicb.2021.806902), 2022-01-21
Supplement: Data_Sheet_1.pdf [file Data_Sheet_1.pdf]

## Supplementary Material

### 1 Supplementary Figures and Tables

#### 1.1 Supplementary Figures

**Supplementary figure 1. The expression of hACE2 in transgenic mice.** (A) The mRNA qualification of human ACE2 was detected in transgenic hACE2 mice by RT-PCR. Ute: uterus; WT: wild type. (B) Agarose gel electrophoresis for hACE2 PCR production.

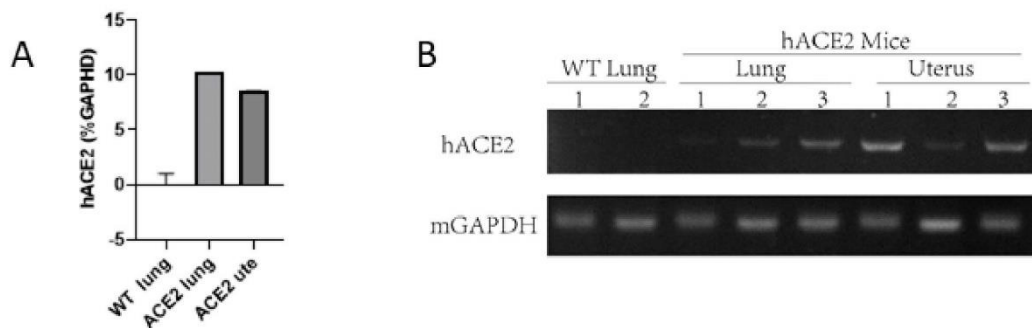

**Supplementary figure 2. The complete absorption fetuses.** (A) The complete absorption of embryos from the infected mice (E 17.5). (B) The FISH of the placenta from the absorption embryos.

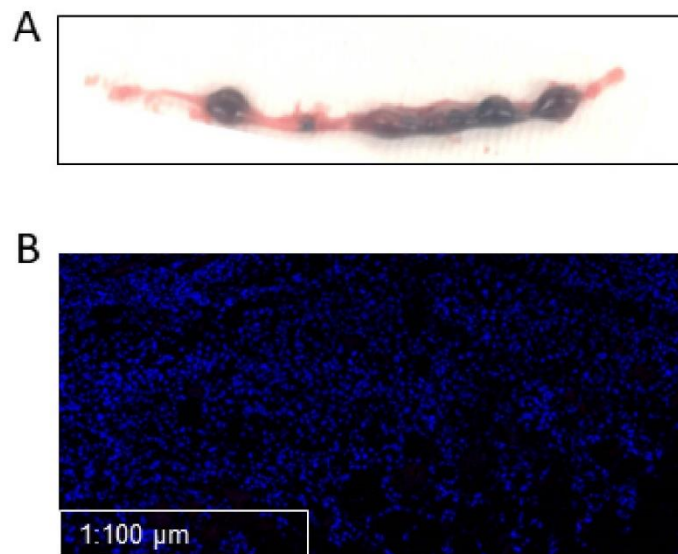

**Supplementary figure 3.** (A) The expression level of several proteins correlated with SARS-CoV-2 entering the target cell in mice blastocyst. Data was acquired from the Gene Expression Omnibus Series (GSE) 133254 mock group. Receptor: ACE2, BSG, AXL, DPP4, KREMEN1, ASRGL1. Coreceptor: NRP1. Cofactor: TMPRSS2, FURIN.

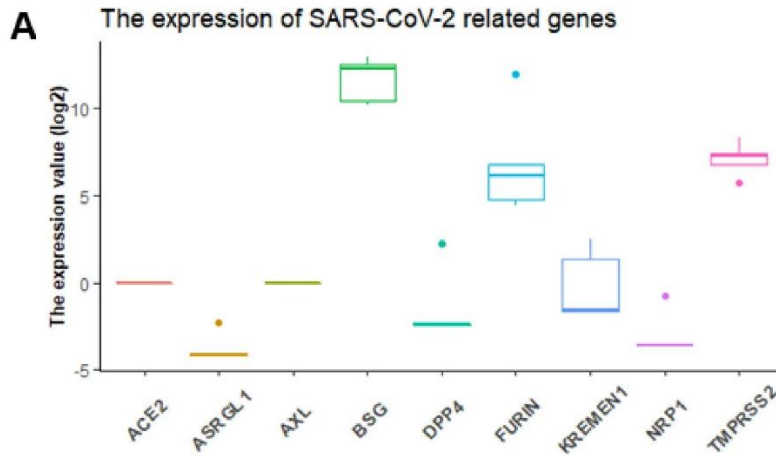

**Supplementary figure 4. The gating strategy for Flow cytometry.**

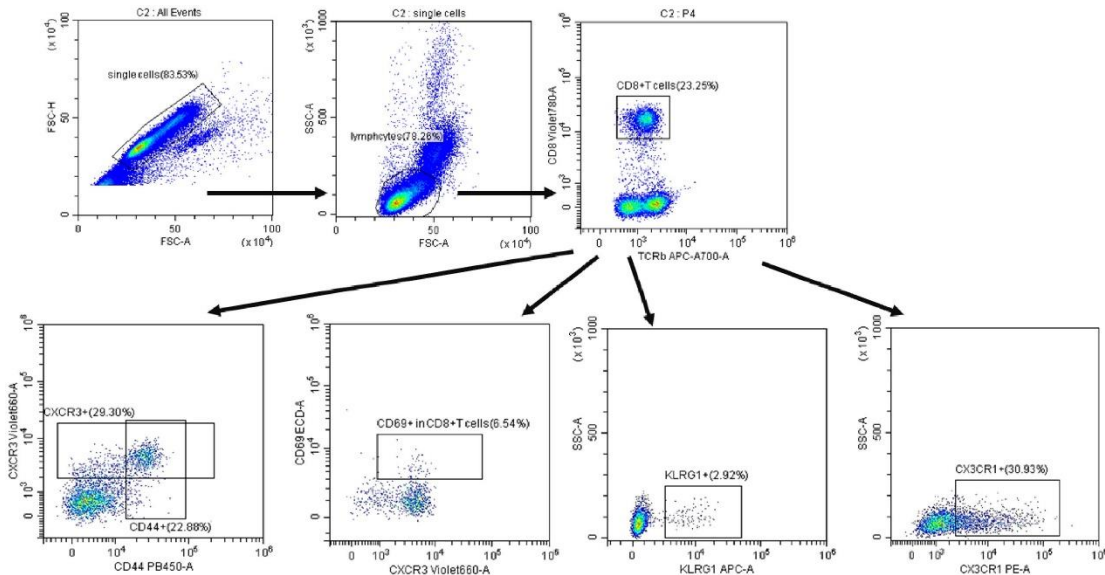

## 1.2 Supplementary Table

The primer sequence is shown below.

| Gene          |         | Sequence (5'-3')         |
|---------------|---------|--------------------------|
| hACE2         | Forward | TGCAGCCACACCTAAGCATT     |
|               | Reverse | GTCACATTTGTGCAGAGGGC     |
| SARS-CoV-2 N  | Forward | GGGGAACTTCTCCTGCTAGAAT   |
|               | Reverse | CAGACATTTTGCTCTCAAGCTG   |
|               | Probe   | TTGCTGCTGCTTGACAGATT     |
| Gapdh         | Forward | CAATGTGTCCGTCGTGGATCT    |
|               | Reverse | GTCCTCAGTGTAGCCCAAGAT    |
|               | Probe   | CGTGCCGCCTGGAGAAACCTGCC  |
| Il-4          | Forward | GGTCTCAACCCCCAGCTAGT     |
|               | Reverse | GCCGATGATCTCTCTCAAGTGAT  |
| Il-6          | Forward | ATCCAGTTGCCTTCTTGGGACTGA |
|               | Reverse | TAAGCCTCCGACTTGTGAAGTGGT |
| Il-13         | Forward | GTATGGAGTGTGGACCTGGC     |
|               | Reverse | TTTTGGTATCGGGGAGGCTG     |
| Il-1 $\alpha$ | Forward | CGCTTGAGTCGGCAAAGAAA     |
|               | Reverse | CTTCCCGTTGCTTGACGTTG     |

|               |         |                         |
|---------------|---------|-------------------------|
| Il-1 $\beta$  | Forward | AATGCCACCTTTTGACAGTGATG |
|               | Reverse | AGCTTCTCCACAGCCACAAT    |
| Nlrp3         | Forward | ATTACCCGCCCCGAGAAAGG    |
|               | Reverse | TCGCAGCAAAGATCCACACAG   |
| Ifn $\gamma$  | Forward | GCTACACACTGCATCTTGGC    |
|               | Reverse | CATGTCACCATCCTTTTGCCAG  |
| Tnf- $\alpha$ | Forward | AGGGTCTGGGCCATAGAACT    |
|               | Reverse | CCACCACGCTCTTCTGTCTAC   |
| Tgfb1         | Forward | CTGGAGTTGTACGGCAGTGG    |
|               | Reverse | GGTTCATGTCATGGATGGTGC   |
| Cxcl9         | Forward | TGTGGAGTTCGAGGAACCCT    |
|               | Reverse | GCCTCGGCTGGTGCTG        |
| Cxcl0         | Forward | CCCACGTGTTGAGATCATTG    |
|               | Reverse | TCCATCACAGCACCGGG       |
| Cxcl11        | Forward | GCGACAAAGTTGAAGTGATTG   |
|               | Reverse | GCATGTTCCAAGACAGCAGA    |

---
